# Supplementary material for: EDOT-based conjugated polymers accessed via C–H direct arylation for efficient photocatalytic hydrogen production
Source: PubMed Central journal article supplement — Chem Sci. 2022 Jan 14;13(6):1725–33. doi: 10.1039/d1sc05784g (PMC8826507; doi:10.1039/d1sc05784g), 2022-01-14
Supplement: SC-013-D1SC05784G-s001.pdf [file SC-013-D1SC05784G-s001.pdf]

## **EDOT-based conjugated polymers accessed via C–H direct arylation for efficient photocatalytic hydrogen production**

Zhi-Rong Tan,<sup>a</sup> Yu-Qin Xing,<sup>a</sup> Jing-Zhao Cheng, Guang Zhang,<sup>b</sup> Zhao-Qi Shen,<sup>a</sup> Yu-Jie Zhang,<sup>a</sup> Guangfu Liao,<sup>c</sup> Long Chen,<sup>b</sup> and Shi-Yong Liu<sup>\*a</sup>

<sup>a</sup> College of Materials, Metallurgical and Chemistry, Jiangxi University of Science and Technology, Ganzhou 341000, P. R. China

<sup>b</sup> Department of Chemistry, Tianjin University, Tianjin 300072, P. R. China

<sup>c</sup> Engineering Research Center of Nano-Geomaterials of Ministry of Education, China University of Geosciences, Wuhan 430074, China

### **Corresponding author:**

\* E-mail: chelsy@zju.edu.cn, chelsy@jxust.edu.cn (S. -Y. Liu)

## Characterizations

Fourier transformed infrared (FTIR) spectra were recorded on an FT-IR spectrometer (Bruker, ALPHA) using a standard KBr pellet technique in the frequency range of 4000–500  $\text{cm}^{-1}$ . Solid state magic angle spinning  $^{13}\text{C}$  CP/MAS NMR measurements were carried out on a Bruker Avance 400 model 400 MHz NMR spectrometer with a MAS rate of 10 kHz. Elemental analysis was measured by a Vario MICRO. The morphology of the photocatalysts was characterized by a scanning electron microscope (SEM, MLA650F, American). TEM images were obtained using a transmission electron microscope (TEM, Tecnai G2-20, American). The thickness of the photocatalysts was characterized by a Bruker Multimode 8 atomic force microscope (AFM) under Scan Asyst mode (Bruker, USA). Water contact angles were measured using JCY type measurement instrument (Shanghai Fang Rui Instrument Co. Ltd.). The UV–vis diffuse reflectance (DRS) spectra of the photocatalysts were recorded on UV-2600 scanning UV-vis spectrophotometer, using  $\text{Ba}_2\text{SO}_4$  as the reference standard. Photoluminescence (PL) spectra was carried out on HORIBA Instruments FL-1000 fluorescence spectrometer. The DLS size distribution of the CPs was measured by a zetasizer (ZS90, Malvern Zetasizer Nano, UK). Pd content was determined by inductively coupled plasma optical emission spectrometer (Agilent ICP-OES 725). Transient photocurrent response (TPR) were measured by an electrochemical workstation (CHI650E/700E, Shanghai) equipped with a conventional three-electrode configuration using a platinum plate as the counter electrode and Ag/AgCl (saturated with KCl) as the reference electrode. To prepare the working electrodes, the photocatalyst was mixed with ethanol to form a slurry, then the above slurry was placed over an In-doped  $\text{SnO}_2$  (ITO) glass (effective area of  $1\text{ cm} \times 1\text{ cm}$ ), and a 0.1 M sodium sulfate aqueous solution was used as the electrolyte. Cyclic voltammetry (CV) measurement was carried out on a CHI660E (Chenhua, Shanghai) electrochemical workstation in a normal three electrode-cell system which using glassy carbon electrode as the working electrode, Ag/AgCl electrode as the reference electrode, platinum wire as the counter electrode. The tetra-n-butylammonium hexafluorophosphate ( $\text{TBAPF}_6$ , 1.5 g) was used as a supporting electrolyte dissolved in 5 ml acetonitrile. According to the equation:  $E_{\text{HOMO}} = -(E^{\text{OX}} + 4.8\text{ eV (v Ag/Ag}^+) - E^{\text{OX}}_{\text{Fc/Fc}^+})$ , where  $E^{\text{OX}}_{\text{Fc/Fc}^+}$  is the oxidation potential of ferrocene/ferrocenium (Fc/Fc<sup>+</sup>) couple,  $E_{\text{HOMO}}$  was calculated from the CV curves.

## Apparent quantum yields measurements

The apparent quantum yield at different wavelengths was measured by inserting 400 nm, 450 nm, 500 nm, 550 nm, and 600 nm band-pass filters, and the irradiation was continued for 2 h for each wavelength region. The light intensity in the photocatalytic reaction was measured using a calibrated

power meter (Model 843R, Newport). The apparent quantum yields (AQY) was calculated according to the following equation:

$$AQY = \frac{\text{number of evolved } H_2 \text{ molecules} \times 2}{\text{number of incident photons}} \times 100\%$$

$$AQY = \frac{2M \times N_A \times h \times c}{S \times P \times t \times \lambda} \times 100\%$$

where M is the amount of H<sub>2</sub> molecules (mol); N<sub>A</sub> is the Avogadro constant (6.022 × 10<sup>23</sup> mol<sup>-1</sup>); h is the Planck constant (6.626 × 10<sup>-34</sup> J•s); c is vacuum light velocity (2.997 × 10<sup>8</sup> m•s<sup>-1</sup>); the irradiation area (S) is 25.5 cm<sup>2</sup> in our experiment; P is the intensity of the irradiating light (W•cm<sup>-2</sup>); t is the photoreaction time (s); and λ is the wavelength of the monochromatic light (m).

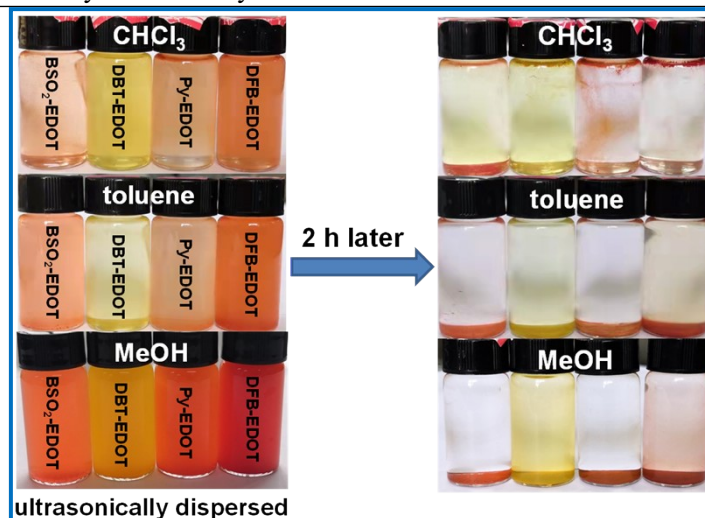

**Fig. S1.** Photograph of CPs dispersed in CHCl<sub>3</sub>, toluene and MeOH *via* conventional sonication for 30 min, and then standing for 2 h.

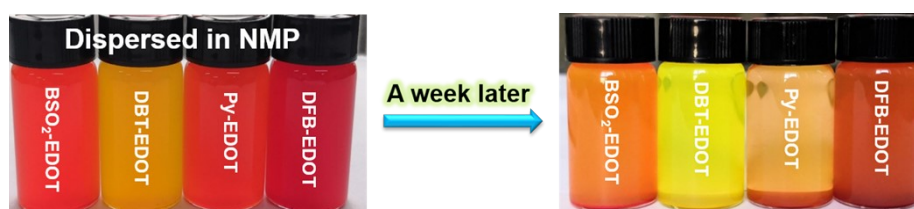

**Fig. S2** Photograph of CPs dispersed in NMP *via* conventional sonication for 30 min, and then standing for a week.

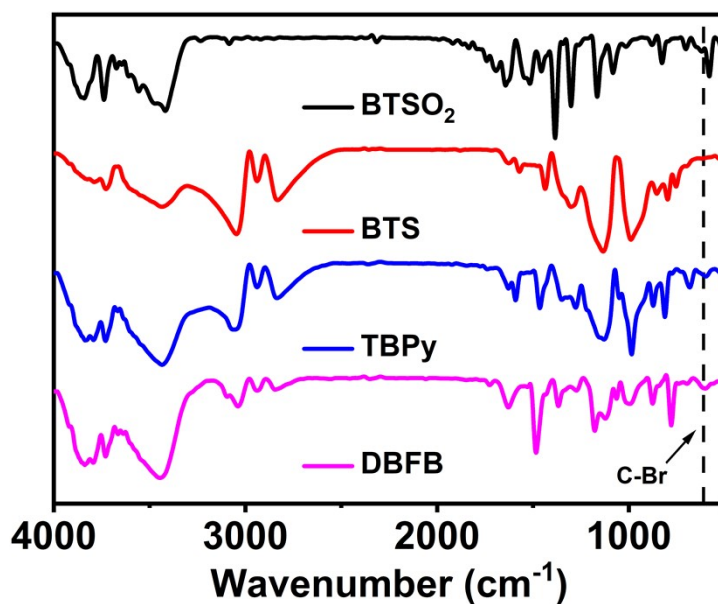

**Fig. S3** FT-IR spectra of aryl bromides.

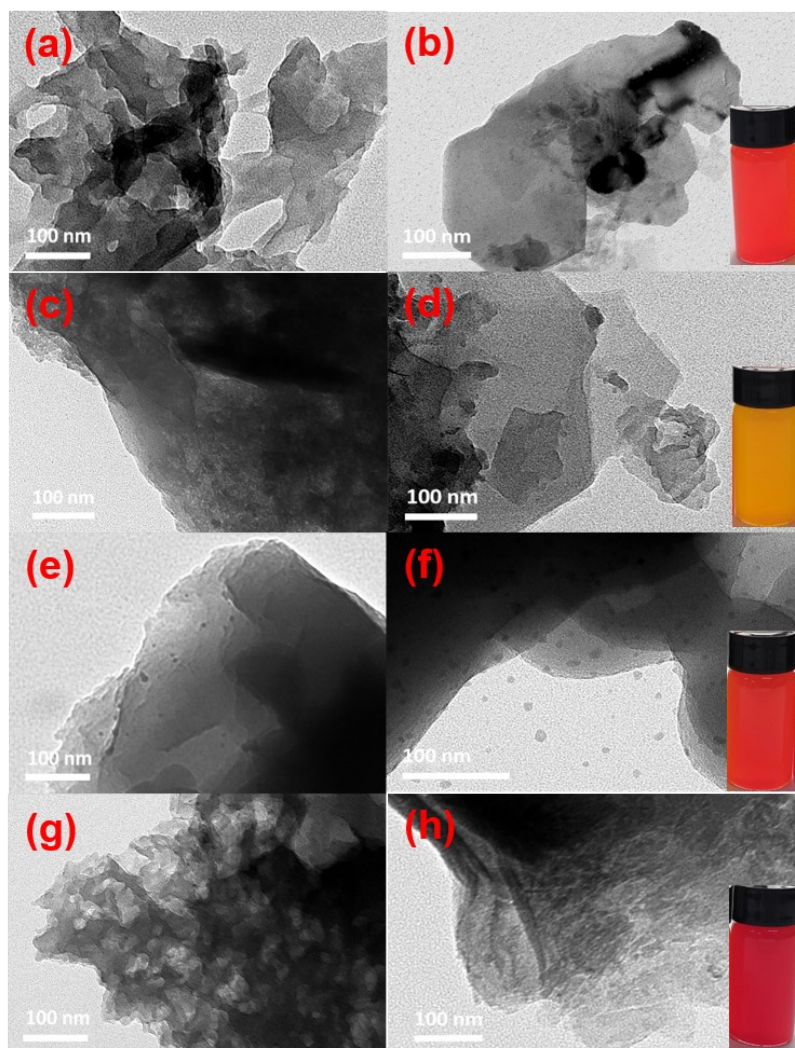

**Fig. S4** TEM images of BSO<sub>2</sub>-EDOT (a, b), DBT-EDOT (c, d), Py-EDOT (e, f), and DFB-EDOT (g, h) (insets: the photographs of CP colloidal dispersions in NMP). (The samples were ultrasonically dispersed in MeOH (a, c, e, g) and NMP (b, d, f, h), respectively, then dropped on the copper mesh).

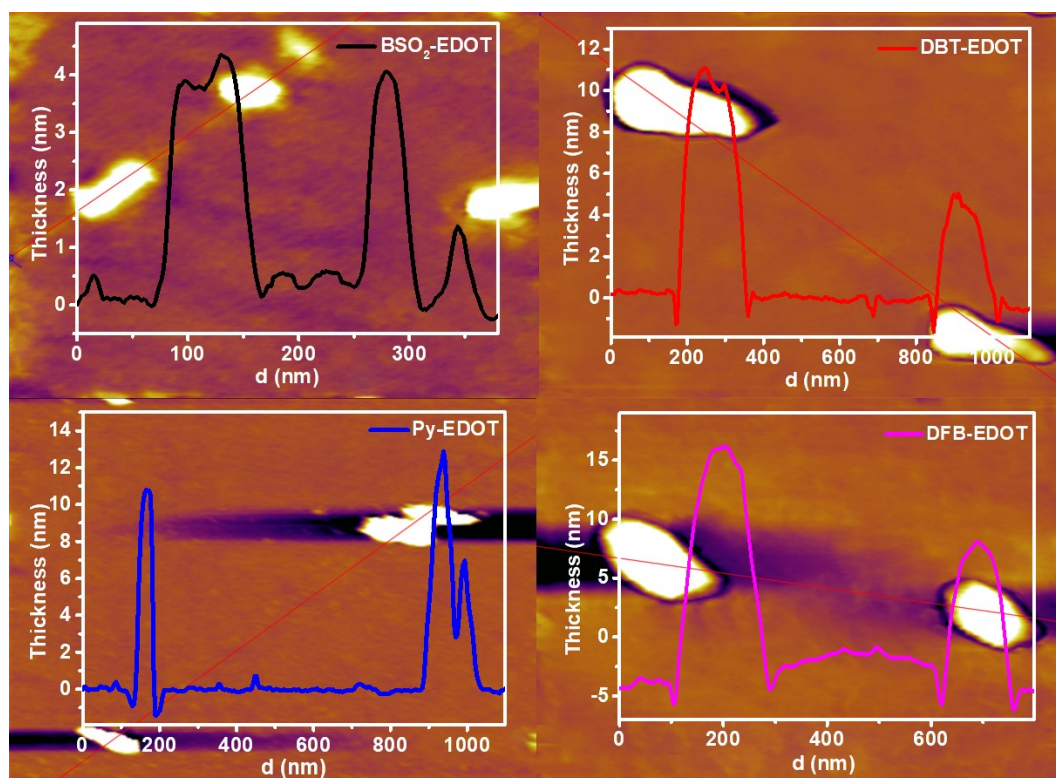

**Fig. S5** AFM images and corresponding thickness analysis of the as-prepared CPs. (The samples were ultrasonically dispersed in NMP and then dropped on the mica slice).

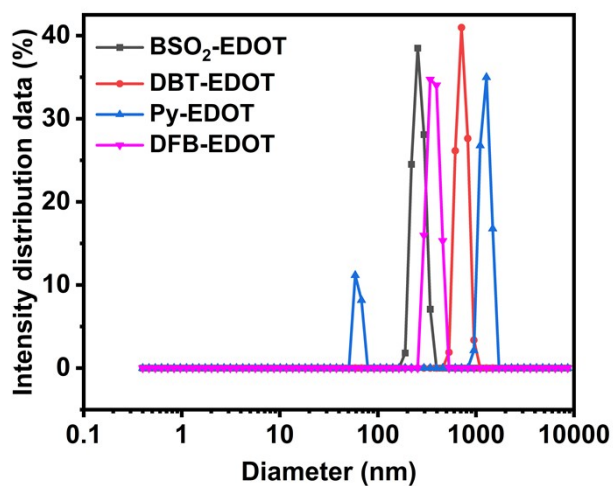

**Fig. S6** Dynamic light scattering (DLS) size distributions of the CPs ultrasonically dispersed in NMP.



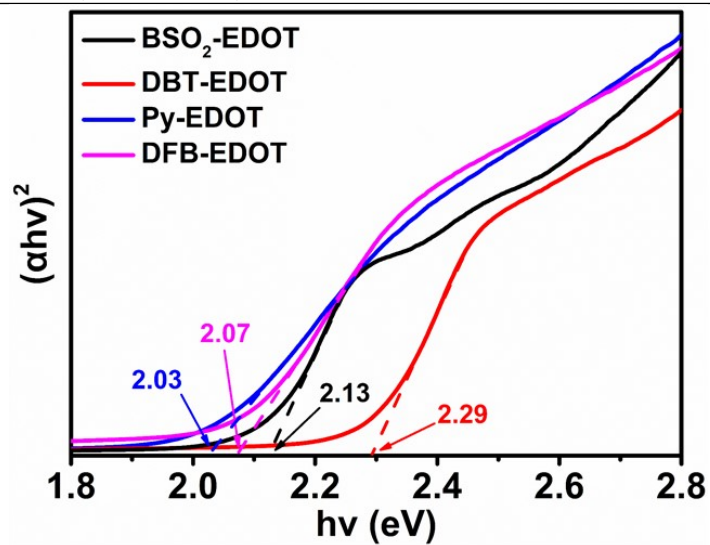

Fig. S7 Tauc plots of the transformed Kubelka–Munk function vs energy.

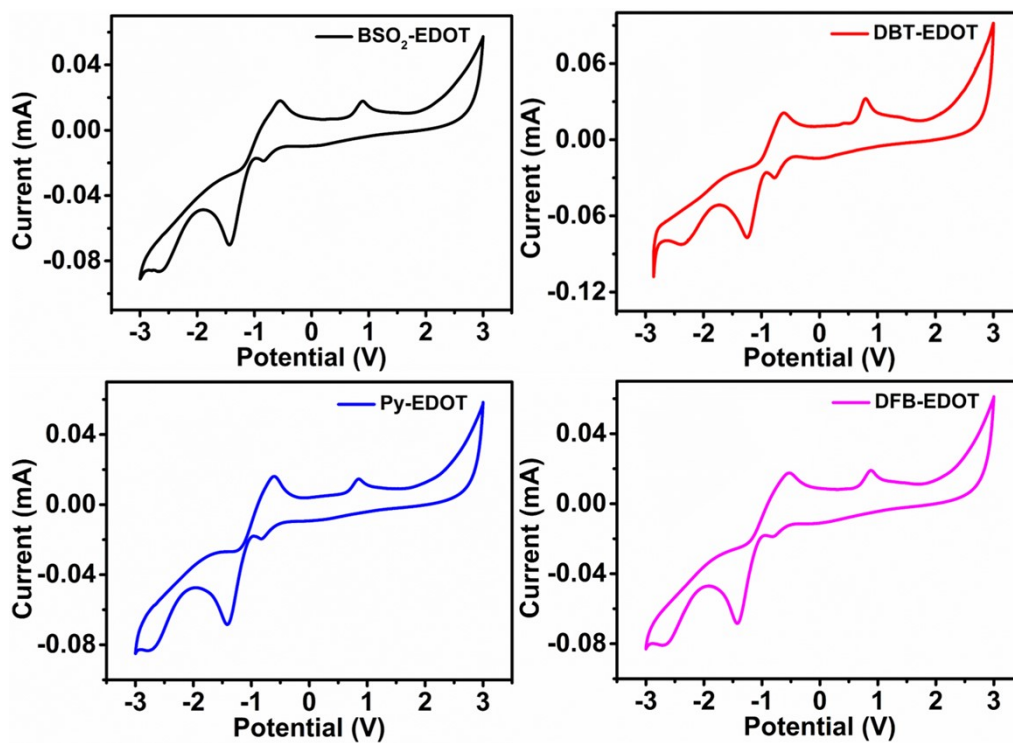

Fig. S8 CV curves of the as-prepared CPs.

**Table S1** Distribution of frontier molecule orbitals (FMOs) of BSO<sub>2</sub>-EDOT, DBT-EDOT, Py-EDOT, and DFB-EDOT predicted by DFT B3LYP/3-21+G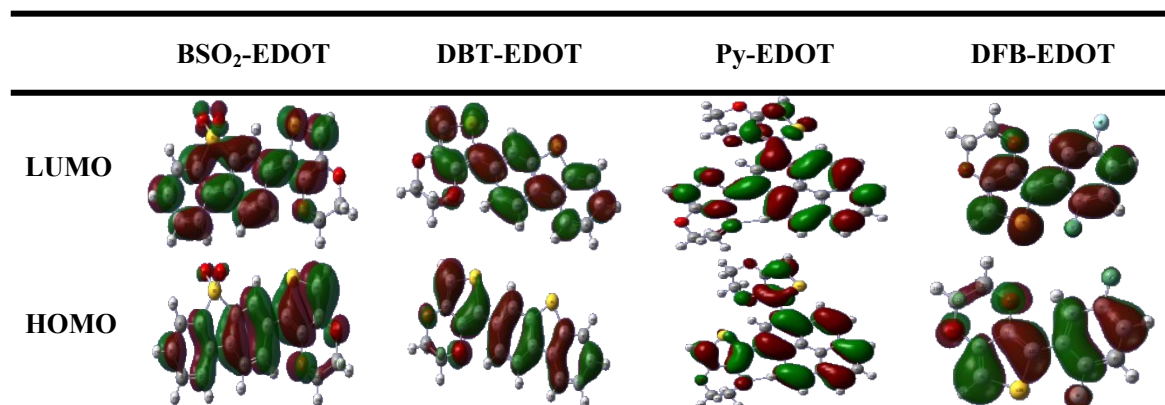**Table S2** Significant properties and HERs of 6 mg CPs photocatalysts in H<sub>2</sub>O/NMP/AA.

| CPs                    | E <sub>g</sub> (eV) | LUMO (eV) | HOMO (eV) | HER (mmol h <sup>-1</sup> ) |
|------------------------|---------------------|-----------|-----------|-----------------------------|
| BSO <sub>2</sub> -EDOT | 2.13                | -3.65     | -5.78     | 0.95                        |
| DBT-EDOT               | 2.29                | -3.35     | -5.64     | 0.39                        |
| Py-EDOT                | 2.03                | -3.58     | -5.61     | 0.07                        |
| DFB-EDOT               | 2.07                | -3.61     | -5.68     | 0.13                        |



**Table S3** Summary of the PHP performances of organic photocatalysts.

| Photocatalyst                                   | Synthetic methods | Co-catalyst | SED  | $\lambda$ (nm) <sup>f</sup> | HER(mmol h <sup>-1</sup> ) (mass of photocatalyst) | AQY (%)     | Ref.      |
|-------------------------------------------------|-------------------|-------------|------|-----------------------------|----------------------------------------------------|-------------|-----------|
| BSO <sub>2</sub> -EDOT <sup>a</sup>             | DArP              | --          | AA   | >420                        | 0.95 (6 mg)                                        | 13.6@550 nm | This work |
| PTB7-Th:EH-IDTBR <sup>b</sup> (Linear CP)       | Stille            | Pt          | AA   | >350                        | 0.13 (2 mg)                                        | 6.2@700 nm  | 1         |
| PyBS-3 <sup>a</sup>                             | Suzuki            | Pt          | AA   | >300                        | 1.05 (10 mg)                                       | 29.3@420 nm | 2         |
| Py-CITP-BT-COF <sup>c</sup>                     | Schiff base       | Pt          | AA   | >420                        | 0.20 (20 mg)                                       | 8.45@420 nm | 3         |
| TtaTfa <sup>c</sup>                             | Schiff base       | Pt          | AA   | >420                        | 0.06 (3 mg)                                        | 1.43@450 nm | 4         |
| B-SOBT-1,3,5-E <sup>a</sup>                     | Sonogashira       | --          | TEOA | >420                        | 0.28 (30 mg)                                       | 3.88@420 nm | 5         |
| NH <sub>2</sub> -UiO-66/TpPa-1-COF <sup>d</sup> | --                | Pt          | SA   | >420                        | 0.23 (10 mg)                                       | --          | 6         |
| Cu-MIM <sup>d</sup>                             | --                | --          | TEA  | >420                        | 0.06 (1 mg)                                        | --          | 7         |
| CTF-BT/Th-1 <sup>e</sup>                        | --                | Pt          | TEOA | >420                        | 0.33 (50 mg)                                       | 7.3@420 nm  | 8         |
| BTT-CPP <sup>a</sup>                            | Suzuki            | --          | AA   | >300                        | 0.23 (6 mg)                                        | 3.3@365 nm  | 9         |
| P10 <sup>a</sup>                                | Suzuki            | --          | TEA  | >420                        | 0.08 (25 mg)                                       | 11.6@420 nm | 10        |
| PFBT/CN <sup>a</sup>                            | Suzuki            | Pt          | TEOA | >420                        | 0.07 (100 mg)                                      | 13.0@500 nm | 11        |
| P1 <sup>a</sup>                                 | --                | Pt          | TEOA | >420                        | 0.05 (50 mg)                                       | 3.58@420 nm | 12        |
| FS-COF <sup>c</sup>                             | Schiff base       | Pt          | AA   | >420                        | 0.05 (5 mg)                                        | 3.2@420 nm  | 13        |
| N-PDBT-O <sup>a</sup>                           | Sonogashira       | --          | TEOA | >420                        | 0.37 (30 mg)                                       | 3.7@420 nm  | 14        |
| P-FSO <sup>a</sup>                              | Suzuki            | --          | TEOA | >420                        | 0.40 (50 mg)                                       | 8.5@420 nm  | 15        |
| DPP-bdy-TPA <sup>a</sup>                        | Suzuki            | --          | TEOA | >300                        | 0.02 (3.5 mg)                                      | 9.6@420 nm  | 16        |
| CP1 <sup>a</sup>                                | DArP              | Pt          | AA   | >420                        | 0.18 (6 mg)                                        | 4.62@550 nm | 17        |

<sup>a</sup> Conjugated polymers (CPs) or conjugated microporous polymer (CMP). <sup>b</sup> organic nanoparticles (NPs). <sup>c</sup> Covalent organic frameworks (COFs). <sup>d</sup> Metal-organic frameworks (MOFs)/covalent organic frameworks (COFs). <sup>e</sup> Covalent triazine frameworks (CTFs). AA: ascorbic acid, SA: sodium ascorbate, TEOA: triethanolamine, and TEA: trimethylamine. <sup>f</sup> All light sources are 300 W Xe lamp.

**Table S4** HERs of PEDOT, BSO<sub>2</sub>-EDOT and PBSO<sub>2</sub> for PHP under visible-light irradiation

| Catalyst               | Co-catalyst | SED  | HER (mmol h <sup>-1</sup> g <sup>-1</sup> ) | Ref.      |
|------------------------|-------------|------|---------------------------------------------|-----------|
| PEDOT                  | --          | AA   | none                                        | This work |
| PBSO <sub>2</sub>      | --          | TEA  | 6.13                                        | 18        |
| PBSO <sub>2</sub>      | --          | TEOA | 2.46                                        | 19        |
| PBSO <sub>2</sub>      | --          | TEA  | 3.26                                        | 10        |
| BSO <sub>2</sub> -EDOT | --          | AA   | 158.4                                       | This work |

  

**PEDOT**                      **BSO<sub>2</sub>-EDOT**                      **PBSO<sub>2</sub>**

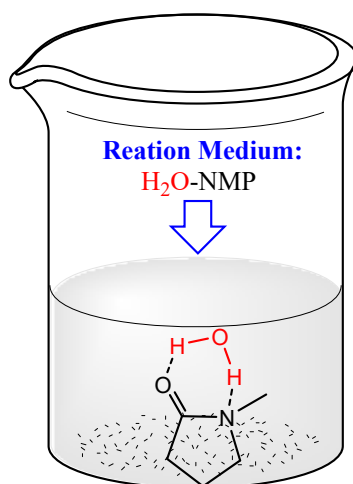**Fig. S9** Schematic diagram for the hydrogen bond non-covalent interaction presented in NMP/H<sub>2</sub>O mixed solvent as a medium for PHP reaction.

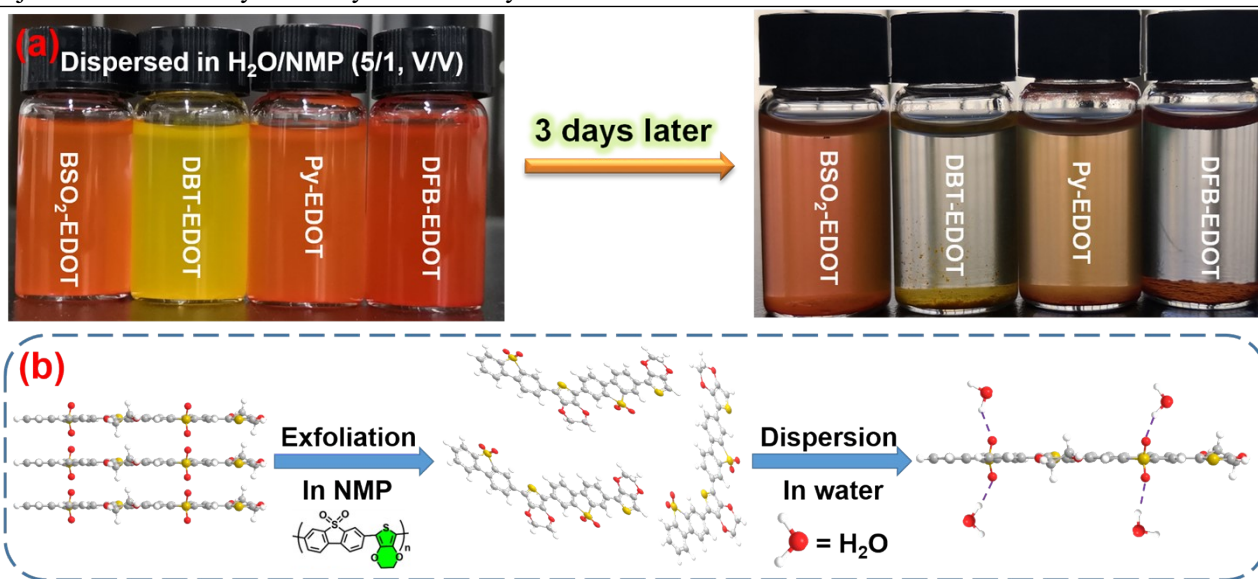

**Fig. S10** (a) CPs ultrasonically dispersed in NMP aqueous solution, which were the same as those used for PHP tests (H<sub>2</sub>O: NMP = 5:1). (b) Schematic diagram for the exfoliation of BSO<sub>2</sub>-EDOT by NMP, and its colloidal dispersion in H<sub>2</sub>O stabilized by hydrogen bonding [Grey balls: C; white balls: H; yellow balls: S; red balls: O.].

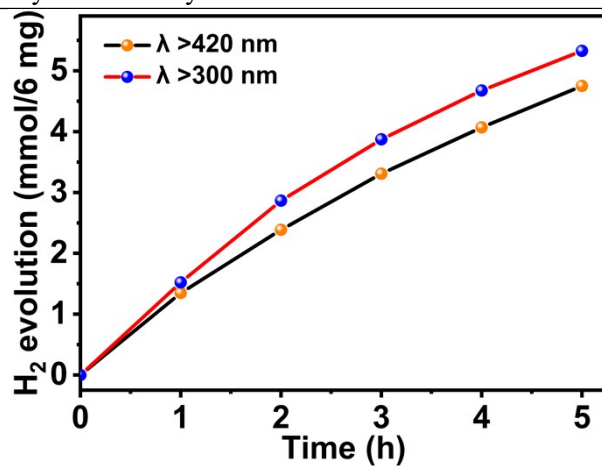

**Fig. S11** HERs of BSO<sub>2</sub>-EDOT under full-arc irradiation and visible light irradiation.

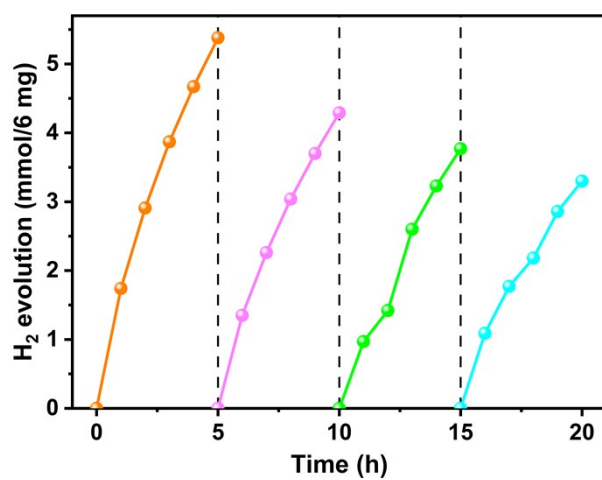

**Fig. S12** Cycling test of PHP (evacuation every 5 h) for BSO<sub>2</sub>-EDOT (6 mg).

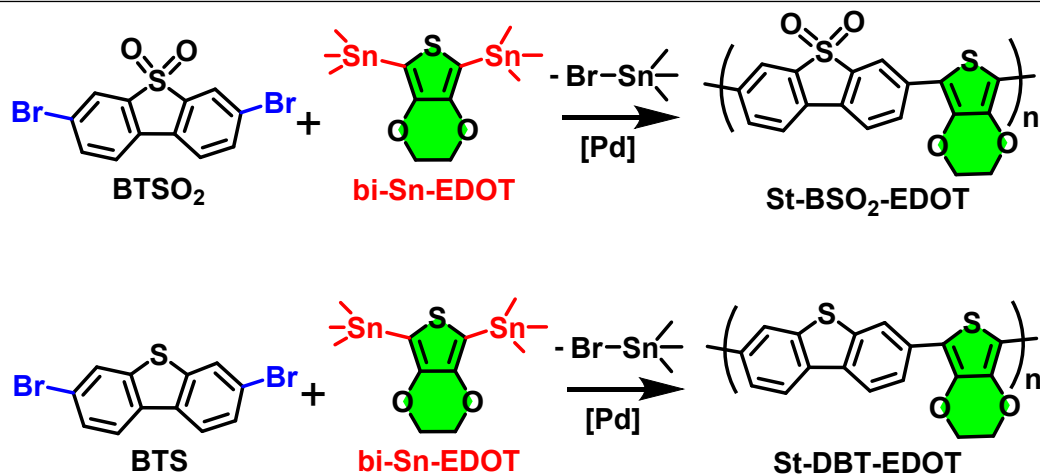

**Scheme S1** Synthetic routes for St-BSO<sub>2</sub>-EDOT and St-DBT-EDOT via Stille coupling.

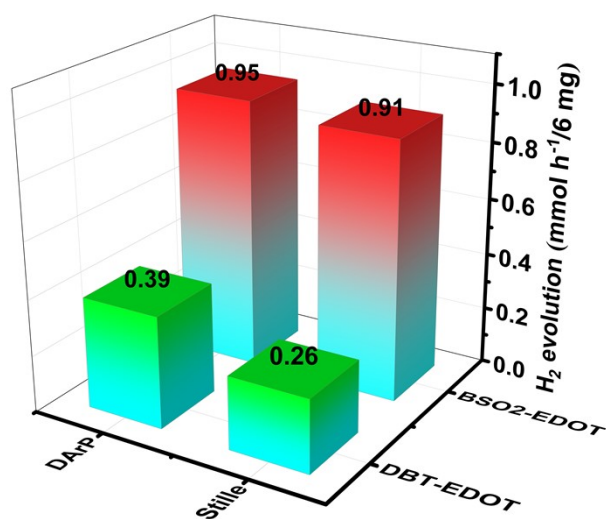

**Fig. S13** HERs of BSO<sub>2</sub>-EDOT, and DBT-EDOT synthesized via DArP or Stille coupling.

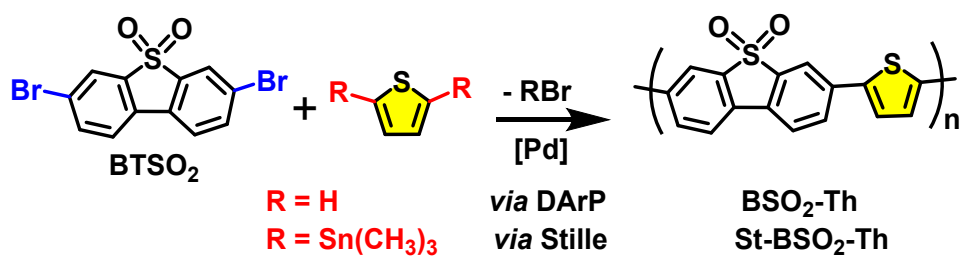

**Scheme S2** Synthetic routes for BSO<sub>2</sub>-Th and St-BSO<sub>2</sub>-Th *via* DArP and Stille coupling, respectively.

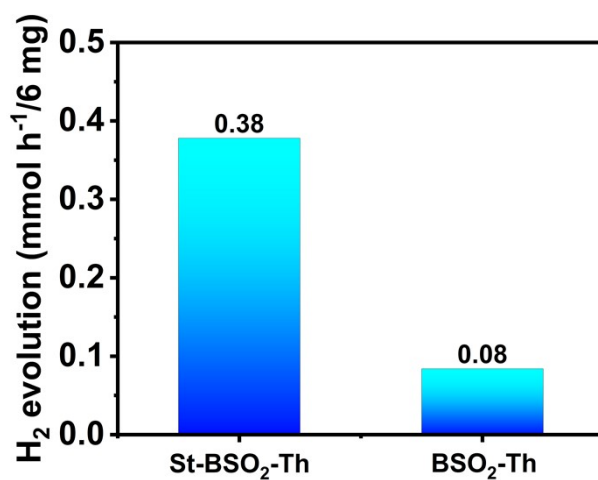

**Fig. S14** HERs of BSO<sub>2</sub>-Th and St-BSO<sub>2</sub>-Th (6 mg) under visible light irradiation.

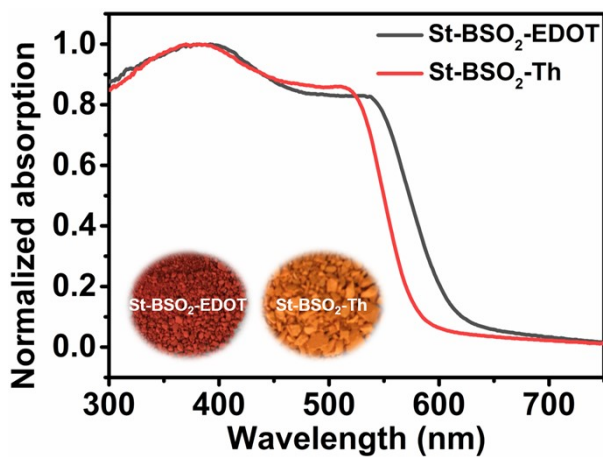

**Fig. S15** UV-vis DRS spectra of St-BSO<sub>2</sub>-EDOT and St-BSO<sub>2</sub>-Th (inset: photographs of samples).



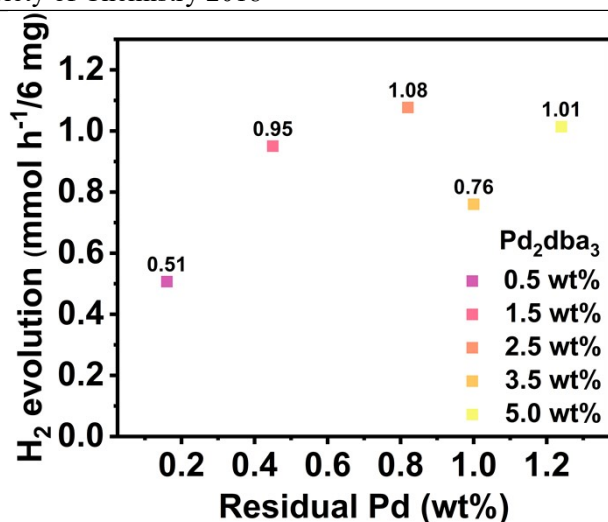

**Fig. S16** Dependences of HERs on the amounts of residual Pd in BSO<sub>2</sub>-EDOTs synthesized by different percentages of Pd<sub>2</sub>dba<sub>3</sub>. [The residual Pd are 0.16 wt%, 0.45 wt%, 0.82 wt%, 1.00 wt% and 1.24 wt%, respectively, for the BSO<sub>2</sub>-EDOTs synthesized by 0.5%, 1.5%, 2.5%, 3.5% and 5.0% Pd<sub>2</sub>dba<sub>3</sub>.]

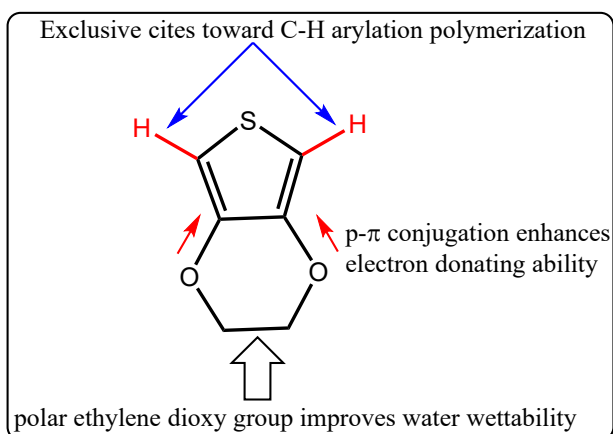

**Fig. S17** Summarized merits of EDOT building block for CP-based photocatalysts.

## References

- 1 J. Kosco, M. Bidwell, H. Cha, T. Martin, C. T. Howells, M. Sachs, D. H. Anjum, S. Gonzalez Lopez, L. Zou, A. Wadsworth, W. Zhang, L. Zhang, J. Tellam, R. Sougrat, F. Laquai, D. M. DeLongchamp, J. R. Durrant and I. McCulloch, *Nat. Mater.*, 2020, **19**, 559-565.
- 2 C. Shu, C. Han, X. Yang, C. Zhang, Y. Chen, S. Ren, F. Wang, F. Huang and J. X. Jiang, *Adv. Mater.*, 2021, **33**, 2008498.
- 3 W. Chen, L. Wang, D. Mo, F. He, Z. Wen, X. Wu, H. Xu and L. Chen, *Angew. Chem., Int. Ed.*, 2020, **59**, 16902-16909.
- 4 J. Yang, A. Acharjya, M. Y. Ye, J. Rabeah, S. Li, Z. Kochovski, S. Youk, J. Roeser, J. Gruneberg, M. Schwarze, T. Wang, Y. Lu, R. van de Krol, M. Oschatz, R. Schomacker, P. Saalfrank, A. Thomas and C. Penschke, *Angew. Chem., Int. Ed.*, 2021, DOI: 10.1002/anie.202104870.
- 5 X. Zhao, B. Chen, W. Dong, S. Wang, Y. Xiang and H. Chen, *J. Mater. Chem. A*, 2021, **9**, 10208-10216.
- 6 F.-M. Zhang, J.-L. Sheng, Z.-D. Yang, X.-J. Sun, H.-L. Tang, M. Lu, H. Dong, F.-C. Shen, J. Liu and Y.-Q. Lan, *Angew. Chem., Int. Ed.*, 2018, **57**, 12106-12110.
- 7 Y. Zang, J. Zhang, R. Wang, Z. D. Wang, Y. Zhu, X. Ren, S. Li, X. Y. Dong and S. Q. Zang, *Chem. Commun.*, 2020, **56**, 6261-6264.
- 8 W. Huang, Q. He, Y. Hu and Y. Li, *Angew. Chem., Int. Ed.*, 2019, **58**, 8676-8680.
- 9 J.-l. Wang, G. Ouyang, D. Wang, J. Li, J. Yao, W.-S. Li and H. Li, *Macromolecules*, 2021, **54**, 2661-2666.
- 10 M. Sachs, R. S. Sprick, D. Pearce, S. A. J. Hillman, A. Monti, A. A. Y. Guilbert, N. J. Brownbill, S. Dimitrov, X. Shi, F. Blanc, M. A. Zwijnenburg, J. Nelson, J. R. Durrant and A. I. Cooper, *Nat. Commun.*, 2018, **9**, 4968.
- 11 J. Chen, C. L. Dong, D. Zhao, Y. C. Huang, X. Wang, L. Samad, L. Dang, M. Shearer, S. Shen and L. Guo, *Adv. Mater.*, 2017, **29**, 1606198.
- 12 J. Yu, X. Sun, X. Xu, C. Zhang and X. He, *Appl. Catal., B*, 2019, **257**, 117935.
- 13 X. Wang, L. Chen, S. Y. Chong, M. A. Little, Y. Wu, W. H. Zhu, R. Clowes, Y. Yan, M. A. Zwijnenburg, R. S. Sprick and A. I. Cooper, *Nat. Chem.*, 2018, **10**, 1180-1189.
- 14 X. Wang, B. Chen, W. Dong, X. Zhang, Z. Li, Y. Xiang and H. Chen, *Macromol. Rapid Commun.*, 2019, **40**, 1800494.
- 15 Z. A. Lan, W. Ren, X. Chen, Y. F. Zhang and X. C. Wang, *Appl. Catal., B*, 2019, **245**, 596-603.
- 16 W. J. Xiao, Y. Wang, W. R. Wang, J. Li, J. D. Wang, Z. W. Xu, J. J. Li, J. H. Yao and W. S. Li, *Macromolecules*, 2020, **53**, 2454-2463.
- 17 W. Y. Huang, Z. Q. Shen, J. Z. Cheng, L. L. Liu, K. Yang, X. R. Chen, H. R. Wen and S. Y. Liu, *J. Mater. Chem. A*, 2019, **7**, 24222-24230.
- 18 Catherine M. Aitchison, R. S. Sprick and A. I. Cooper, *J. Mater. Chem. A*, 2019, **7**, 2490-2496.
- 19 G. Shu, Y. Li, Z. Wang, J.-X. Jiang and F. Wang, *Appl. Catal., B*, 2020, **261**, 118230.
